# Supplementary material
Source: Springer Nature journal article supplement (https://www.springermedizin.de/resource/supplementary/12885_2006_593_MOESM1_ESM.pdf/9469846)
Supplement: MOESM1 [file 9469846]

Normal  
epithelium

Fascin

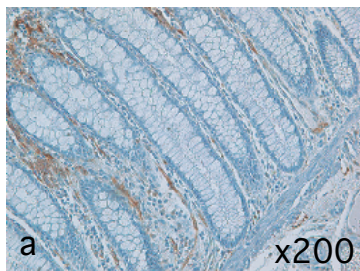

Ki67

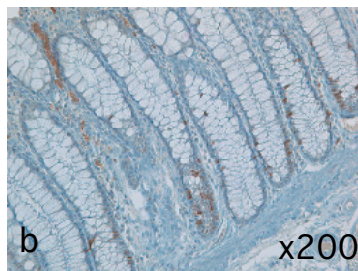

Adenomas

Sporadic adenoma

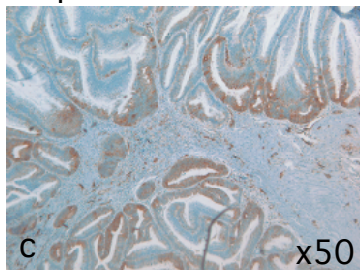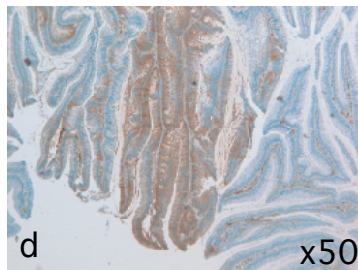

FAP

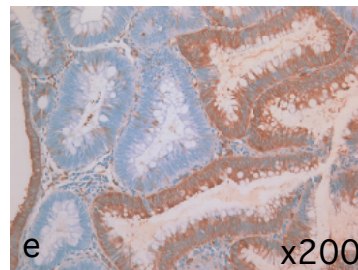

Fascin

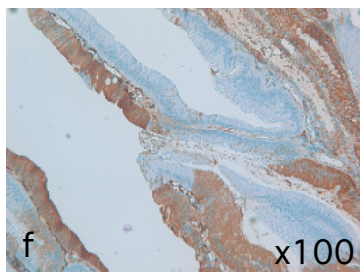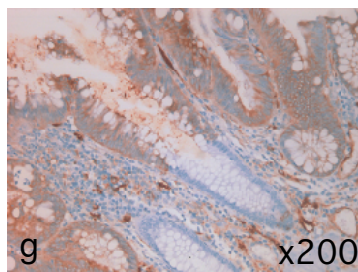

Carcinomas

Moderately  
differentiated

Poorly  
differentiated

Fascin in stroma

Fascin

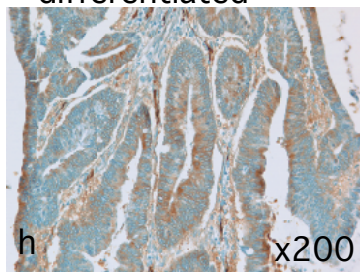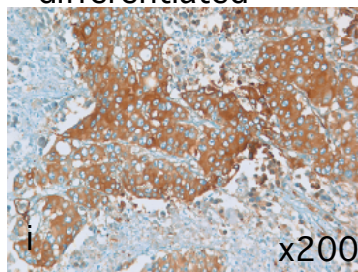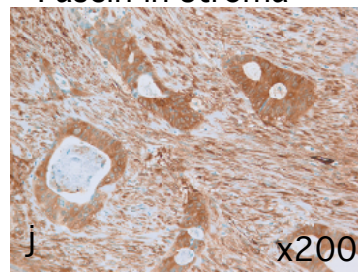

Ki67

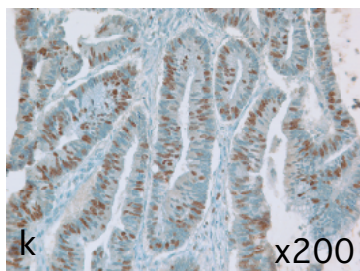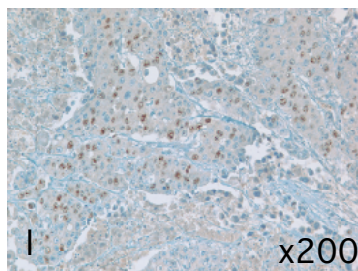

Fascin

Ki67

Fascin

Ki67

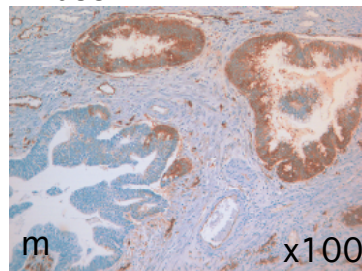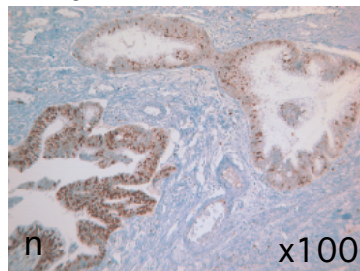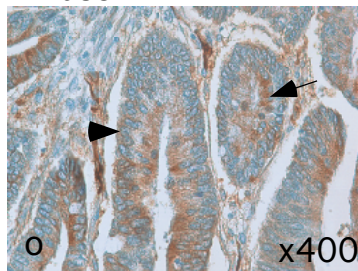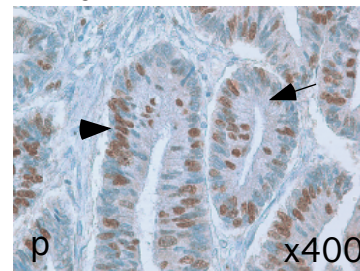

Adenoma

Carcinoma
